# Supplementary material for: Prognosis analysis and validation of lipid metabolism-associated lncRNAs and tumor immune microenvironment in bladder cancer
Source: publisher site journal article supplement (doi:10.18632/aging.204975), 2023-08-24
Supplement: Supplementary file [file aging-v15i16-204975-supplementary-material-SD1.pdf]

**SUPPLEMENTARY FIGURE**

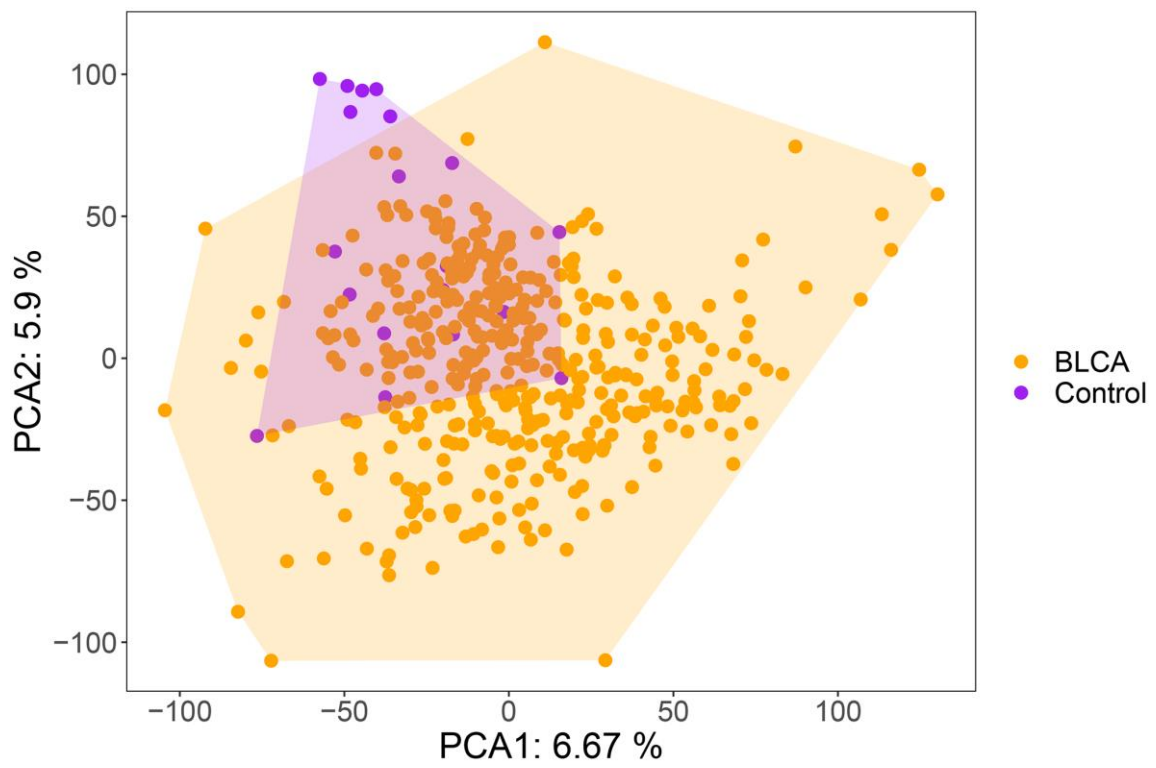

**Supplementary Figure 1. Principal components analysis of tumor and normal sample in the TCGA dataset.**
